# Supplementary material
Source: MDPI journal article supplement (https://www.mdpi.com/2073-8994/15/1/100)
Supplement: s1 [file s1]

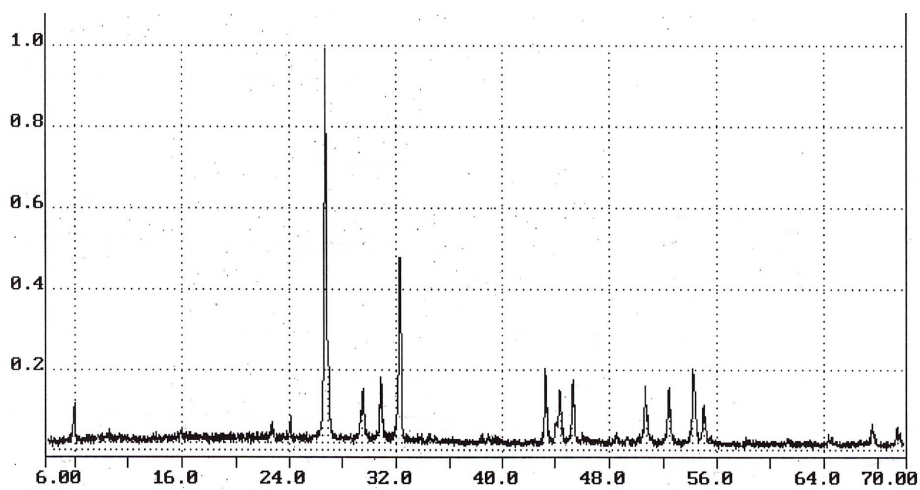

(a)

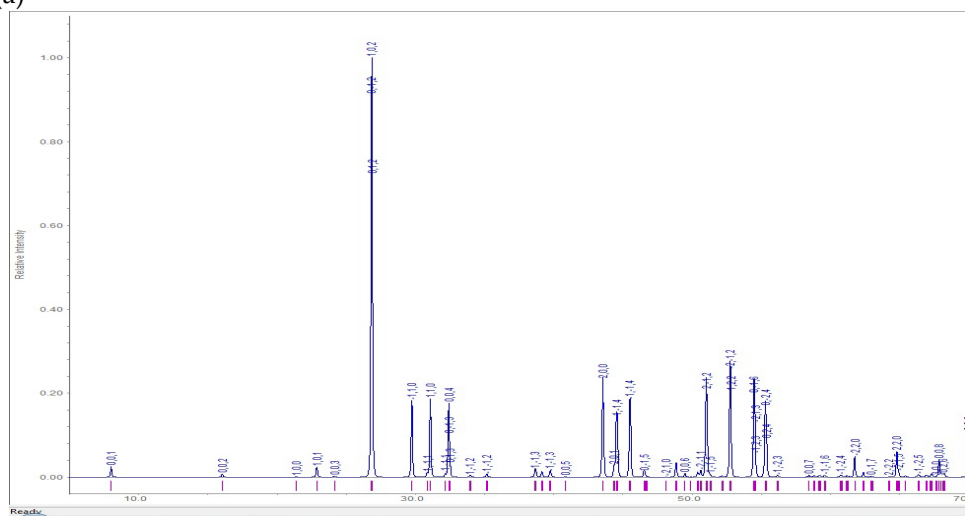

(b)

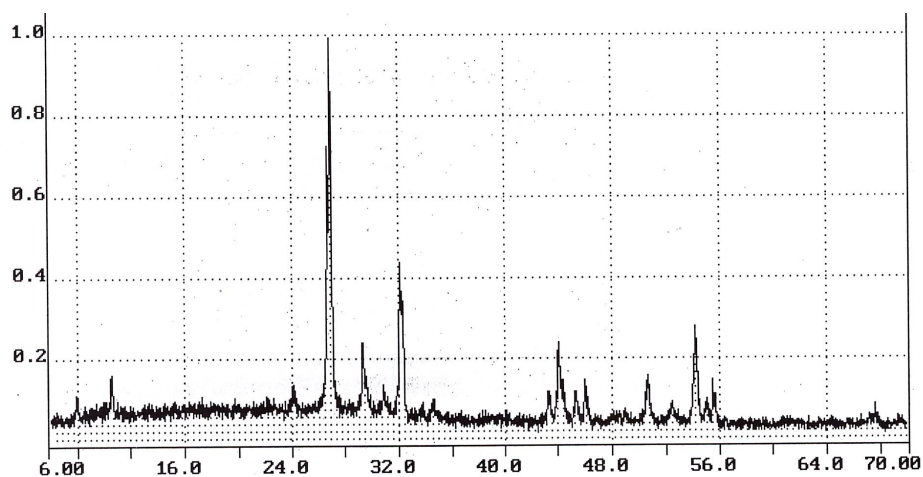

(c)

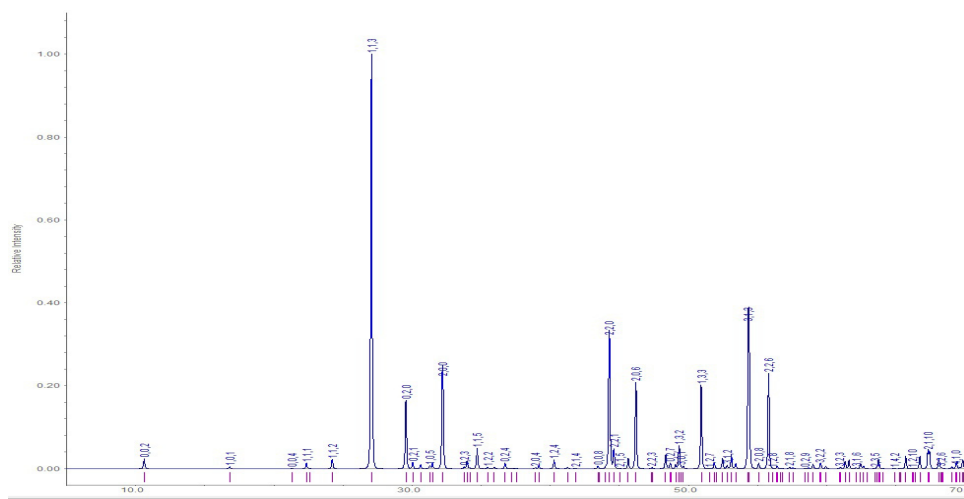

(d)

**Figure S1 (a - d).** Experimental powder diffraction pattern of PbF(IO<sub>3</sub>) crystals, DRON-UM diffractometer, Cu K $\alpha$  radiation, 2 $\theta$ -interval 6 – 70.0 °, **(a)** experiment, **(b)** simulated powder diffraction pattern for PbF(IO<sub>3</sub>) **(c)** total mass of crystals of experiment with predominance of Pb(IO<sub>3</sub>)<sub>2</sub>, **(d)** simulated powder diffraction pattern for Pb(IO<sub>3</sub>)<sub>2</sub>.

**Table S1.** Atomic coordinates and equivalent displacement parameters for PbF(IO<sub>3</sub>) orthorhombic unit cell.  $U_{\text{equ}}$  is defined as one third of the trace of the orthogonalized  $U_{ij}$  tensor.

| Atom | $x/a$       | $y/b$     | $z/c$       | $U_{\text{equ}}, \text{\AA}^2$ |
|------|-------------|-----------|-------------|--------------------------------|
| Pb   | 0.66160(18) | 0         | 0.13246(6)  | 0.0125(4)                      |
| I    | 0.1319(8)   | 0         | 0.36824(11) | 0.0132(12)                     |
| F    | 0.883(2)    | 0.25      | 0           | 0.014(3)                       |
| O1   | 0.361(3)    | -0.150(3) | 0.3022(18)  | 0.0149(13)                     |
| O2   | 0.282(3)    | -0.249(3) | 0.4296(16)  | 0.012(4)                       |
| O3   | 0.034(4)    | -0.124(3) | 0.222(2)    | 0.018(4)                       |

**Table S2.** Interatomic distances for PbF(IO<sub>3</sub>) orthorhombic unit cell.

| Bond          | Distance, \AA | Bond         | Distance, \AA |
|---------------|---------------|--------------|---------------|
| Pb – F (x2)   | 2.458(7)      | Pb – O3 (x2) | 2.51(2)       |
| Pb – F (x2)   | 2.659         | Pb – O3 (x2) | 2.57(2)       |
| Average       | 2.558         | Average      | 2.54          |
| I – O1 (x2)   | 1.79(2)       |              |               |
| I – O2 (x2)   | 1.832(19)     |              |               |
| I – O3 (x2)   | 1.86(2)       |              |               |
| Average I – O | 1.827         |              |               |

**Table S3.** Atomic coordinates and equivalent displacement parameters for PbF(IO<sub>3</sub>) monoclinic unit cell.  $U_{\text{equ}}$  is defined as one third of the trace of the orthogonalized  $U_{ij}$  tensor.

| Atom | $x/a$     | $y/b$      | $z/c$      | $U_{\text{equ}}, \text{\AA}^2$ |
|------|-----------|------------|------------|--------------------------------|
| Pb   | 0.6616(2) | -0.6616(2) | 0.13207(3) | 0.00514(18)                    |
| I    | 0.1299(5) | -0.1290(5) | 0.36880(7) | 0.0061(4)                      |
| F1   | 0.147(3)  | -0.634(4)  | -0.003(2)  | 0.0105(18)                     |
| O2   | 0.154(4)  | 0.081(3)   | 0.2217(13) | 0.015(2)                       |
| O4   | 0.533(3)  | -0.034(3)  | 0.4317(14) | 0.015(2)                       |

|    |          |           |            |          |
|----|----------|-----------|------------|----------|
| O7 | 0.195(4) | -0.516(4) | 0.3042(16) | 0.019(3) |
|----|----------|-----------|------------|----------|

**Table S4.** Interatomic distances for PbF(IO<sub>3</sub>) monoclinic unit cell

| Bond          | Distance, Å | Bond    | Distance, Å |
|---------------|-------------|---------|-------------|
| Pb – F1       | 2.421(16)   | Pb – O2 | 2.527(15)   |
| Pb – F1       | 2.510(17)   | Pb – O2 | 2.553(15)   |
| Pb – F1       | 2.62(2)     |         |             |
| Pb – F1       | 2.616(17)   |         |             |
| Average       | 2.542       | Average | 2.54        |
| I – O7        | 1.790(17)   |         |             |
| I – O4        | 1.840(15)   |         |             |
| I – O2        | 1.845(14)   |         |             |
| Average I – O | 1.825       |         |             |
